# Supplementary material
Source: Springer Nature journal article supplement (https://www.springermedizin.de/resource/supplementary/40170_2013_18_MOESM7_ESM.pdf/25787602)

**A**

| Compound               | 1                  | 2                | 3                 | 4       |
|------------------------|--------------------|------------------|-------------------|---------|
| Structure              |                    |                  |                   |         |
| hLDHA IC <sub>50</sub> | 0.0026 ± 0.0019 μM | 0.016 ± 0.007 μM | 0.080 ± 0.0022 μM | > 50 μM |
| hLDHB IC <sub>50</sub> | 0.043 ± 0.014 μM   | 0.22 ± 0.02 μM   | 0.055 ± 0.009 μM  | > 50 μM |

**B**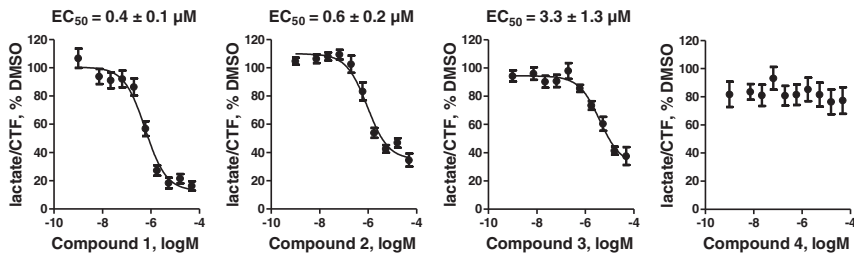**C**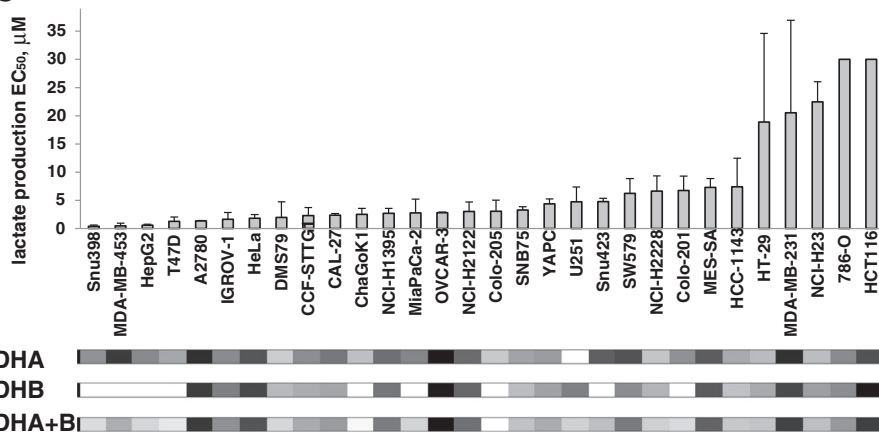

Supplement: MOESM7 [file 25787602]
